# Supplementary material for: Core–shell Pd(0)@His-SiO2/CoFe2O4 nano-composite as a magnetically recoverable heterogeneous catalyst for the deprotection of oximes and Heck coupling
Source: Royal Society of Chemistry journal article supplement (doi:10.1039/d4re00060a), 2024-01-01
Supplement: d4re00060a1.pdf [file d4re00060a1.pdf]

## Core-shell Pd(0)@His-SiO<sub>2</sub>/CoFe<sub>2</sub>O<sub>4</sub> nano-composite as magnetically recoverable heterogeneous catalyst for deprotection of oximes and Heck coupling

Vrinda Sharma, Anu Choudhary, Surbhi Sharma, Gunjan Vaid and Satya Paul \*

*Department of Chemistry, University of Jammu, Jammu 180006, India. Fax: +91-191-2431365; Tel: +91-191-2453969; Email: [paul7@rediffmail.com](mailto:paul7@rediffmail.com).*

| <b>List of Contents</b>                                                                    | <b>Page</b> |
|--------------------------------------------------------------------------------------------|-------------|
| <b>no.</b>                                                                                 |             |
| S1. General procedure for the oxidative deprotection of oximes and Heck coupling           | 1-2         |
| S2. Spectral details of the compounds listed in Table 3                                    | 2-4         |
| S3. Spectral details of the compounds listed in Table 4                                    | 5           |
| S4. <sup>1</sup> H NMR and <sup>13</sup> C NMR spectra of some compounds listed in Table 3 | 6-14        |
| S5. <sup>1</sup> H NMR and <sup>13</sup> C NMR spectra of some compounds listed in Table 4 | 15-16       |

### **S1. General procedure for the oxidative deprotection of oximes**

In a 50 mL round-bottom flask, oxime (1 mmole), TEMPO (0.30 mmole), Pd(0)@His-SiO<sub>2</sub>/CoFe<sub>2</sub>O<sub>4</sub> (1 mmole) and toluene (10 mL) was added and the reaction mixture was agitated at 90 °C. In order to monitor the progress of reaction, TLC was checked after repeated intervals. After the completion of reaction, the catalyst was taken out of the reaction mixture using an external magnet and was washed with acetone (3×5 mL), ethyl acetate (3×5 mL), and deionized water (3×5 mL). The catalyst was dried at room temperature for further use. Toluene was removed from the reaction mixture under a reduced pressure. The residue was diluted using ethyl acetate and washed with water (3×5 mL). The ethyl acetate layer was recovered and dried over anhydrous Na<sub>2</sub>SO<sub>4</sub> and the obtained crude product was purified after the removal of solvent either by crystallization or by column chromatography using n-hexane and ethyl acetate as eluting solvents.

### **General procedure for the Heck coupling**

In a 50 mL round-bottom flask, a combination of aryl halide (1 mmole), styrene (1 mmole), K<sub>2</sub>CO<sub>3</sub> (1.5 mmole), Pd(0)@His-SiO<sub>2</sub>/CoFe<sub>2</sub>O<sub>4</sub> (1 mmole) as a catalyst and ethanol (10

mL) were added. The reaction was stirred at 80 °C and the advancement of the reaction was monitored after repeated intervals using TLC. After the completion of the reaction, catalyst was separated from the reaction mixture with the help of an external magnet. Catalyst was washed with acetone (3×5 mL), ethyl acetate (3×5 mL), deionized water (3×5 mL) and dried at room temperature for its further use. The reaction mixture was then diluted with ethyl acetate, washed with water (3×5 mL) and the ethyl acetate layer was separated using a separating funnel. The obtained layer was dried over anhydrous Na<sub>2</sub>SO<sub>4</sub> and crude product was then purified by column chromatography using n-hexane and ethyl acetate as eluting solvents.

## S2. Spectral data of some compounds in Table 3

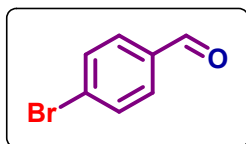

### 4-Bromobenzaldehyde (2a)

<sup>1</sup>H NMR (400 MHz, CDCl<sub>3</sub>): δ 10.00 (s, 1H, CHO), 7.78 (d, *J* = 7.8 Hz, 2H, Ar-H), 7.71 (d, *J* = 7.8 Hz, 2H, Ar-H); <sup>13</sup>C NMR (100 MHz, CDCl<sub>3</sub>): δ 191.45, 135.05, 132.44, 130.99, 129.79.

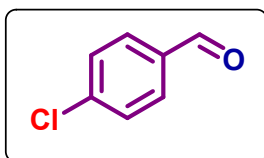

### 4-Chlorobenzaldehyde (2b)

<sup>1</sup>H NMR (400 MHz, CDCl<sub>3</sub>): δ 10.00 (s, 1H, CHO), 7.84 (d, *J* = 8.3 Hz, 2H, Ar-H), 7.53 (d, *J* = 8.2 Hz, 2H, Ar-H); <sup>13</sup>C NMR (100 MHz, CDCl<sub>3</sub>): δ 191.06, 140.97, 134.70, 130.93, 129.47.

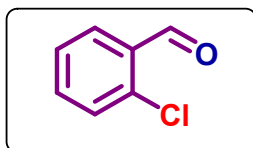

### 2-Chlorobenzaldehyde (2c)

<sup>1</sup>H NMR (400 MHz, CDCl<sub>3</sub>): δ 10.34 (s, 1H, CHO), 7.79 (d, *J* = 7.6 Hz, 1H, Ar-H), 7.44-7.27 (m, 3H, Ar-H); <sup>13</sup>C NMR (100 MHz, CDCl<sub>3</sub>): δ 189.69, 137.78, 135.15,

132.28, 130.53, 129.26, 127.25.

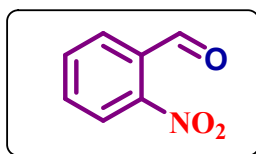

### 2-Nitrobenzaldehyde (2d)

<sup>1</sup>H NMR (400 MHz, CDCl<sub>3</sub>): δ 10.42 (s, 1H, CHO), 8.13 (d, *J* = 8 Hz, 1H, Ar-H), 7.96 (d, *J* = 8 Hz, 1H, Ar-H), 7.76-7.84 (m, 2H, Ar-H); <sup>13</sup>C NMR (100 MHz, CDCl<sub>3</sub>): δ 188.24, 149.48, 133.92, 133.56, 131.22, 129.27, 124.32.

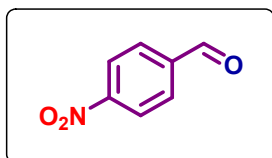

### 4-Nitrobenzaldehyde (2e)

<sup>1</sup>H NMR (400 MHz, CDCl<sub>3</sub>): δ 10.19 (s, 1H, CHO), 8.43 (d, *J* = 8.5 Hz, 2H, Ar-H), 8.11 (d, *J* = 8.5 Hz, 2H, Ar-H); <sup>13</sup>C NMR (100 MHz, CDCl<sub>3</sub>): δ 190.63, 151.87, 140.16, 130.63, 124.55.

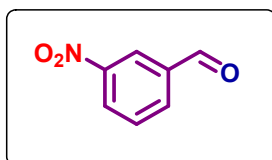

### 3-Nitrobenzaldehyde (2f)

<sup>1</sup>H NMR (400 MHz, CDCl<sub>3</sub>): δ 10.15 (s, 1H, CHO), 8.75 (s, 1H, Ar-H), 8.52 (d, *J* = 8.3 Hz, 1H, Ar-H), 8.26 (d, *J* = 8.4 Hz, 1H, Ar-H), 7.80 (t, *J* = 7.2 Hz, 1H, Ar-H); <sup>13</sup>C NMR (100 MHz, CDCl<sub>3</sub>): δ 189.63, 148.67, 137.30, 134.42, 130.35, 128.49, 124.34.

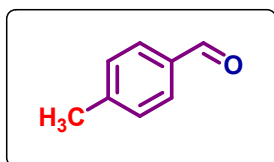

#### 4-Methylbenzaldehyde (2g)

<sup>1</sup>H NMR (400 MHz, CDCl<sub>3</sub>): δ 9.97 (s, 1H, CHO), 7.78 (d, *J* = 7.7 Hz, 2H, ArH), 7.34 (d, *J* = 7.7 Hz, 2H, ArH), 2.44 (s, 3H, CH<sub>3</sub>); <sup>13</sup>C NMR (101 MHz, CDCl<sub>3</sub>): δ 192.10, 145.52, 134.16, 129.74, 129.05, 21.91.

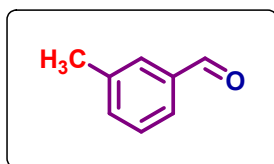

#### 3-Methylbenzaldehyde (2h)

<sup>1</sup>H NMR (400 MHz, CDCl<sub>3</sub>): δ 10.01 (s, 1H, CHO), 7.71-7.69 (m, 2H, ArH), 7.48-7.42 (m, 2H, ArH), 2.46 (s, 3H, CH<sub>3</sub>); <sup>13</sup>C NMR (101 MHz, CDCl<sub>3</sub>): δ 192.70, 138.94, 136.46, 135.34, 130.05, 128.90, 127.27, 20.94.

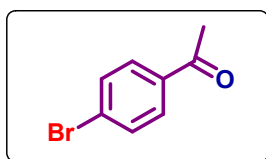

#### 4-Bromoacetophenone (2i)

<sup>1</sup>H NMR (400 MHz, CDCl<sub>3</sub>): δ 7.84 (d, *J* = 8.3 Hz, 2H, Ar-H), 7.63 (d, *J* = 8.5 Hz, 2H, Ar-H), 2.61 (s, 3H, COCH<sub>3</sub>); <sup>13</sup>C NMR (100 MHz, CDCl<sub>3</sub>): δ 197.08, 135.73, 131.75, 129.87, 128.48, 26.46.

### S3. Spectral data of some compounds in Table 4

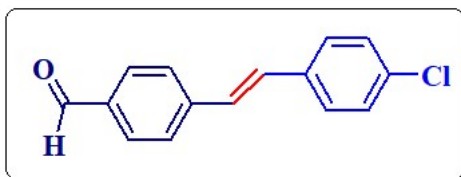

#### 4-(4-chlorostyryl)benzaldehyde (5b, 5e)

$^1\text{H}$  NMR (400 MHz,  $\text{CDCl}_3$ ):  $\delta$  9.69 (s, 1H, -CHO),  $\delta$  7.75-7.66 (m, 8H, Ar-H), 6.92 (d,  $J$  = 16.0 Hz, 1H, C=CH), 6.88 (d,  $J$  = 16.0 Hz, 1H, C=CH);  $^{13}\text{C}$  NMR (100 MHz,  $\text{CDCl}_3$ ):  $\delta$  193.27, 151.34, 132.93, 132.44, 132.26, 131.91, 131.68, 129.82, 129.71, 129.01, 125.67.

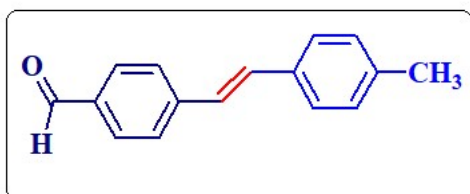

#### 4-(4-methylstyryl)benzaldehyde (5c, 5f)

$^1\text{H}$  NMR (400 MHz,  $\text{CDCl}_3$ ):  $\delta$  9.74 (s, 1H, -CHO),  $\delta$  7.60 (d,  $J$  = 7.6 Hz, 4H, Ar-H), 7.46 (d,  $J$  = 7.5 Hz, 4H, Ar-H),  $\delta$  6.75 (d,  $J$  = 16 Hz, 1H, C=CH),  $\delta$  6.75 (d,  $J$  = 16 Hz, 1H, C=CH),  $\delta$  2.22 (s, 3H, -CH<sub>3</sub>);  $^{13}\text{C}$  NMR (100 MHz,  $\text{CDCl}_3$ ):  $\delta$  191.07, 137.89, 137.26, 136.67, 133.12, 132.33, 130.68, 130.05, 128.70, 128.41, 123.35, 21.08.

### S4. <sup>1</sup>H NMR and <sup>13</sup>C NMR spectra of some compounds listed in Table 3

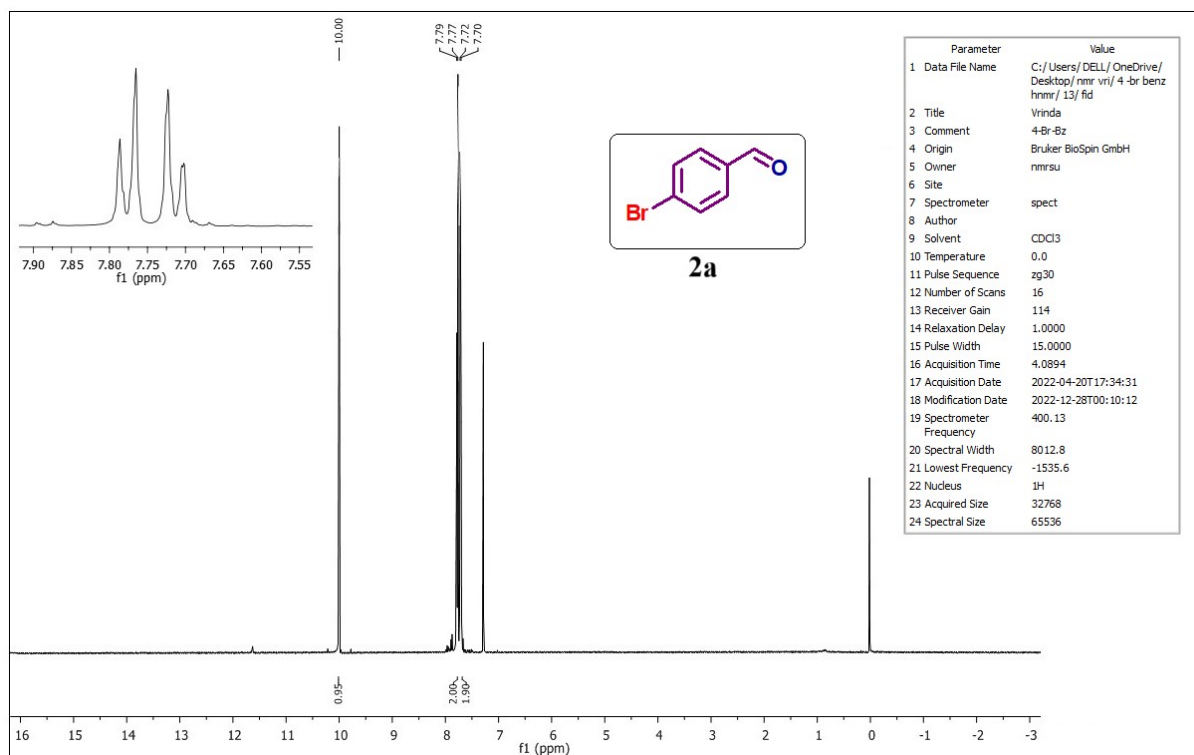

Figure 1. <sup>1</sup>H NMR spectra of 4-Bromobenzaldehyde.

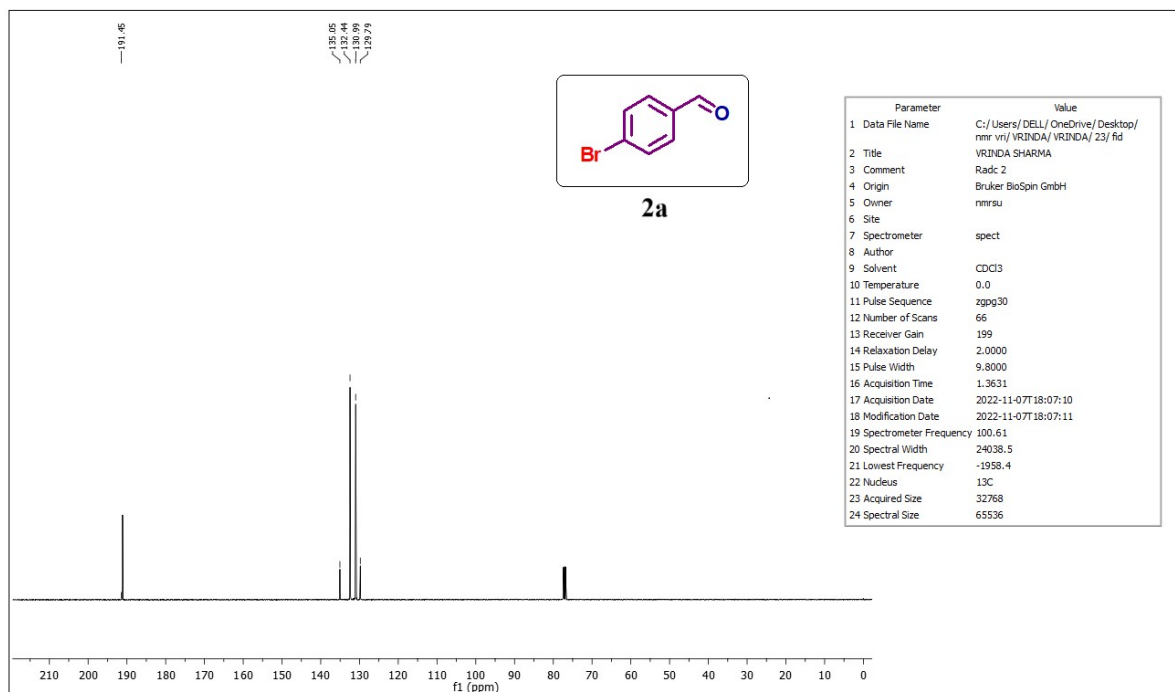

Figure 2. <sup>13</sup>C NMR spectra of 4-Bromobenzaldehyde.

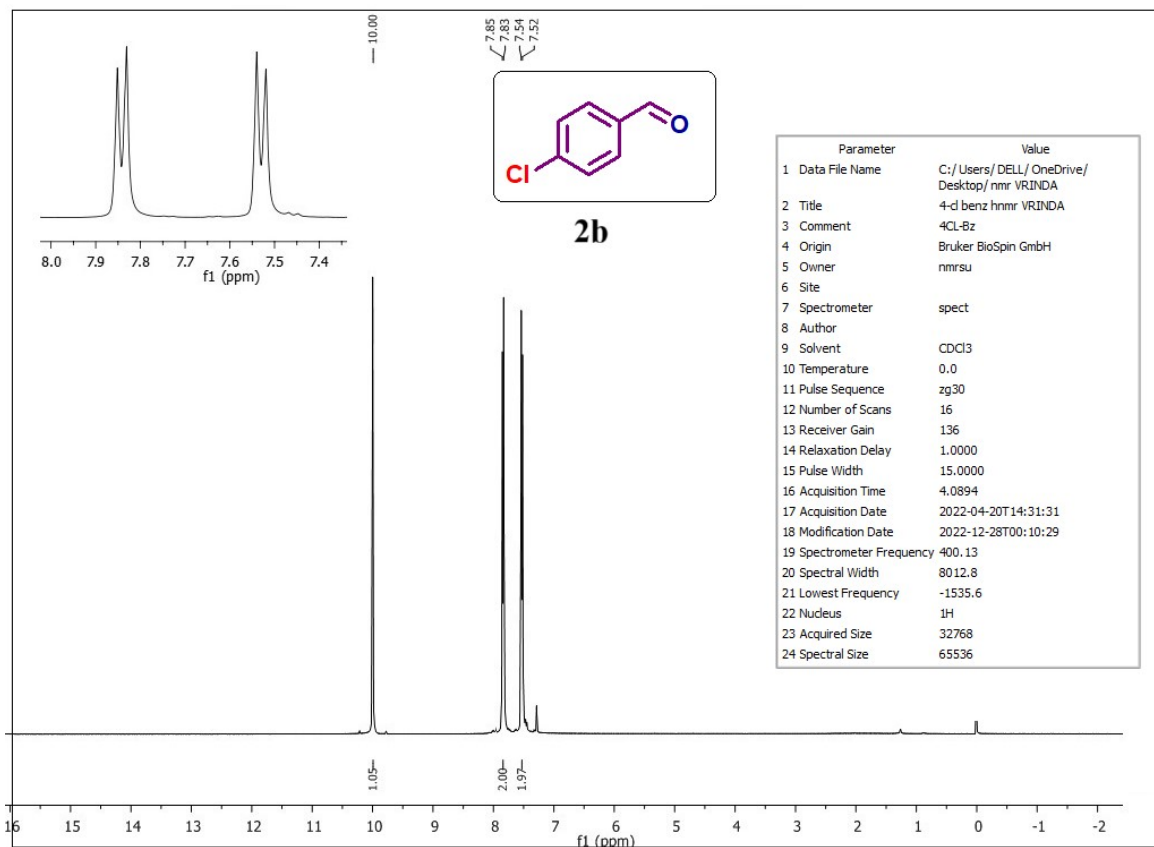

**Figure 3.** <sup>1</sup>H NMR spectra of 4-Chlorobenzaldehyde.

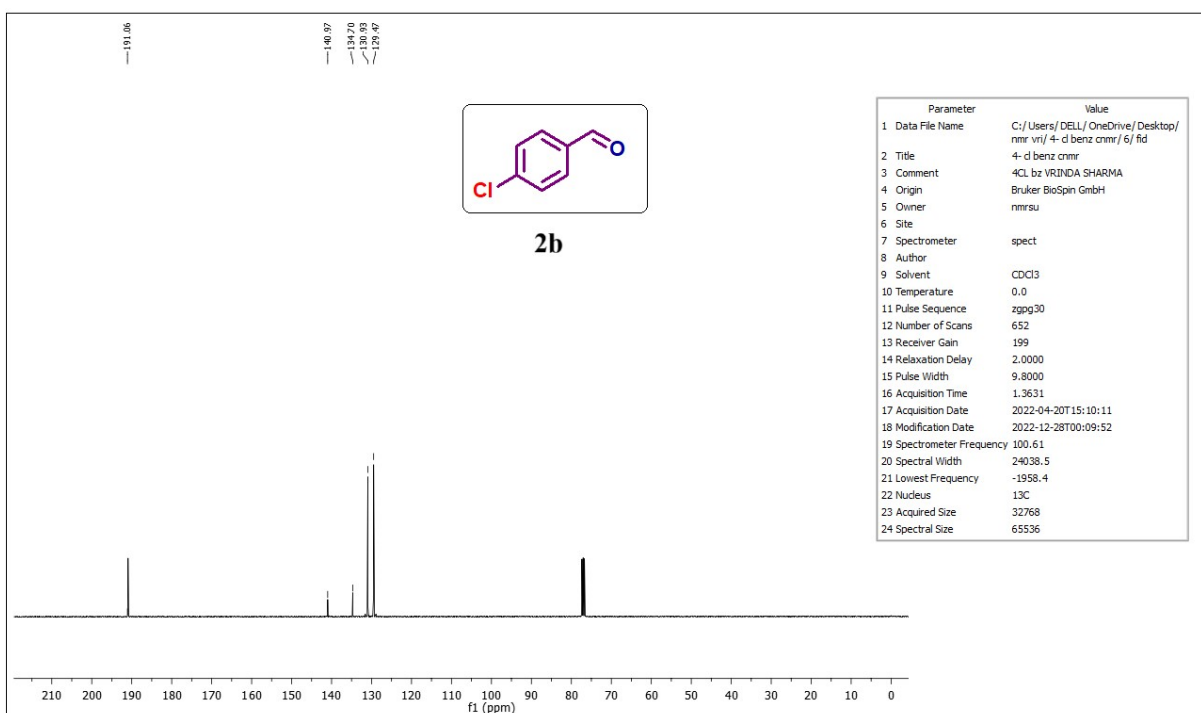

**Figure 4.** <sup>13</sup>C NMR spectra of 4-Chlorobenzaldehyde.

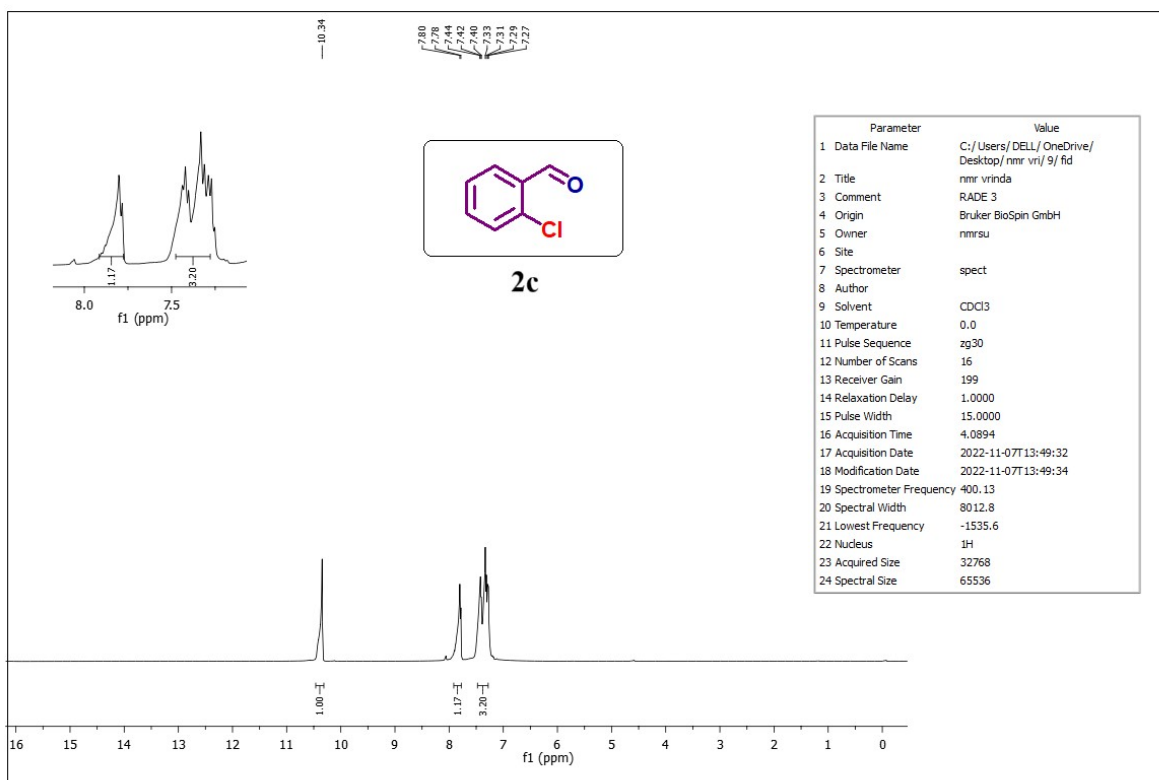

Figure 5. <sup>1</sup>H NMR spectra of 2-Chlorobenzaldehyde.

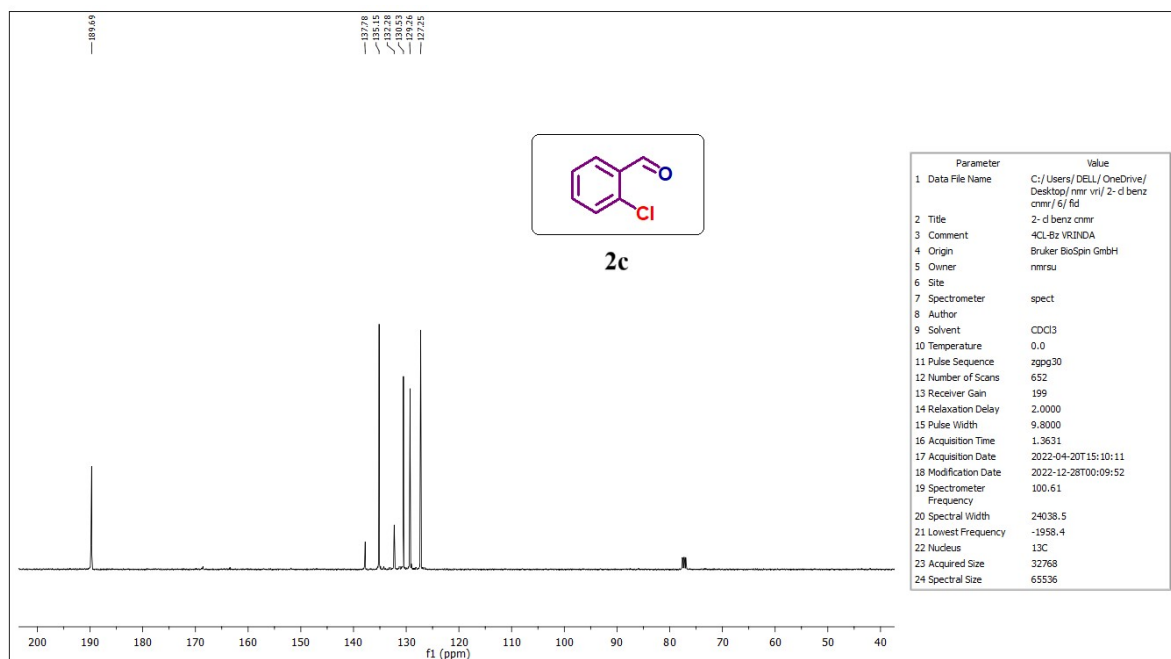

Figure 6. <sup>13</sup>C NMR spectra of 2-Chlorobenzaldehyde.



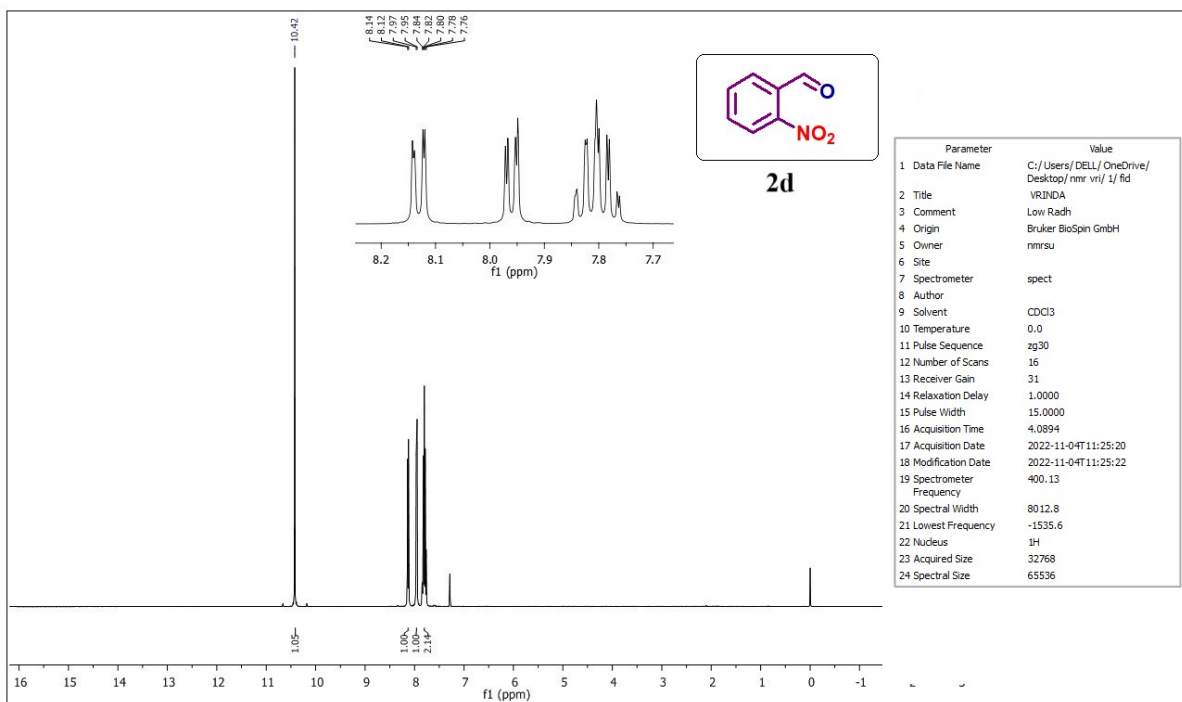

Figure 7.  $^1\text{H}$  NMR spectra of 2-Nitrobenzaldehyde.

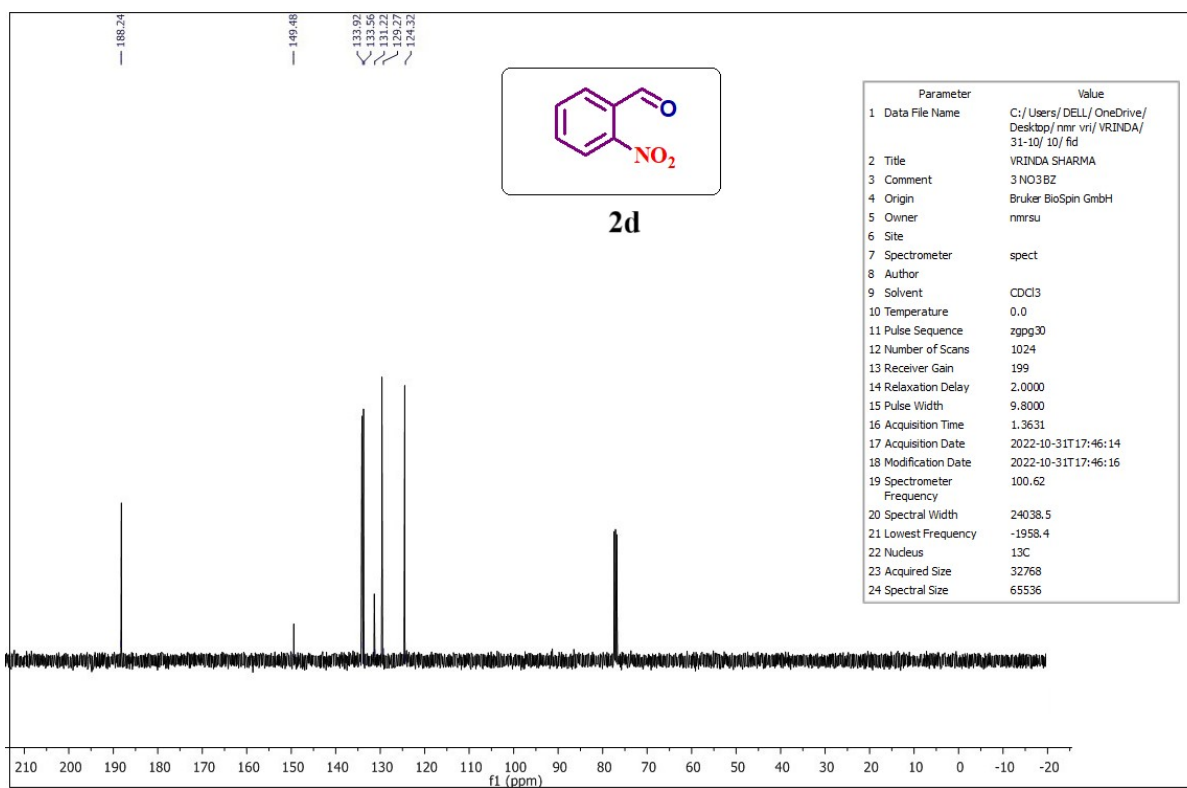

Figure 8.  $^{13}\text{C}$  NMR spectra of 2-Nitrobenzaldehyde.

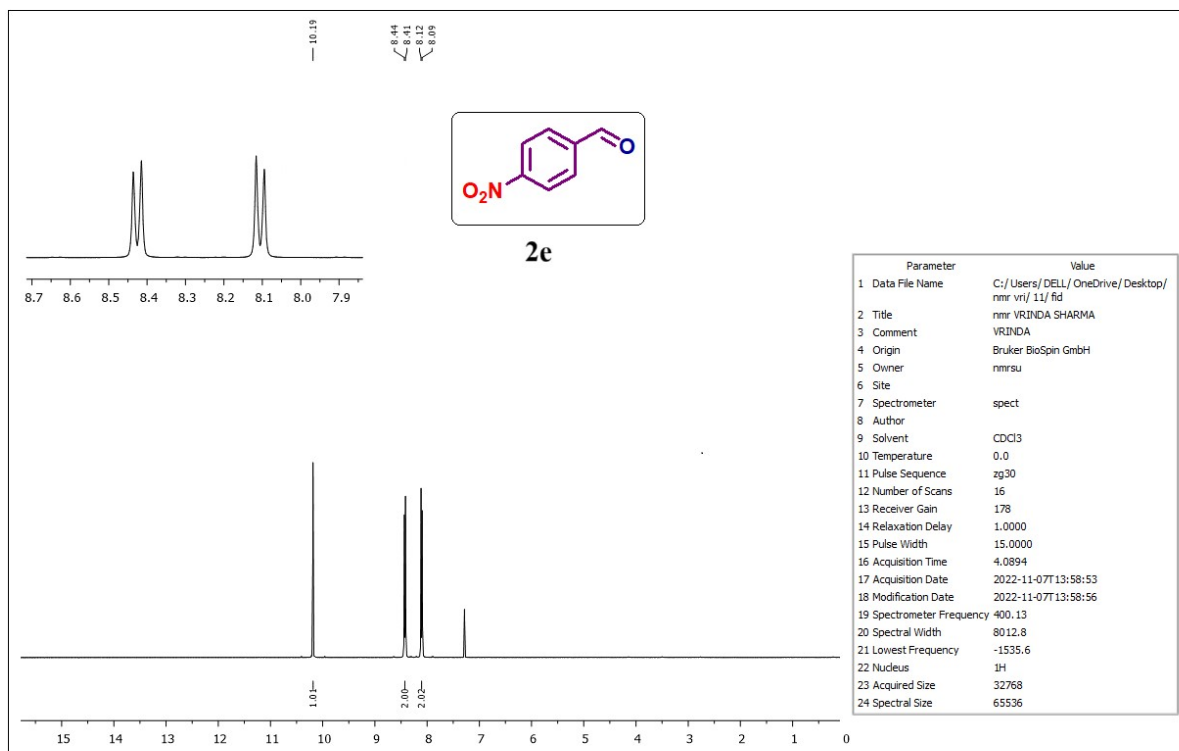

Figure 9. <sup>1</sup>H NMR spectra of 4-Nitrobenzaldehyde.

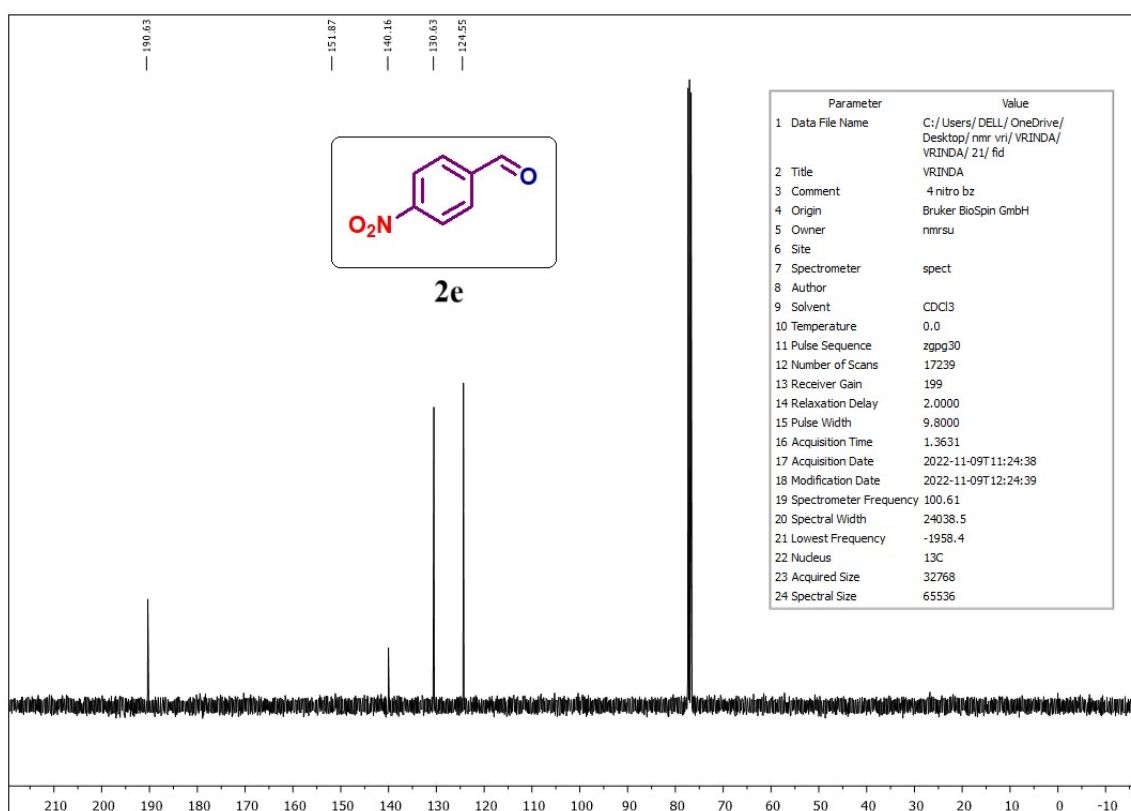

Figure 10. <sup>13</sup>C NMR spectra of 4-Nitrobenzaldehyde.

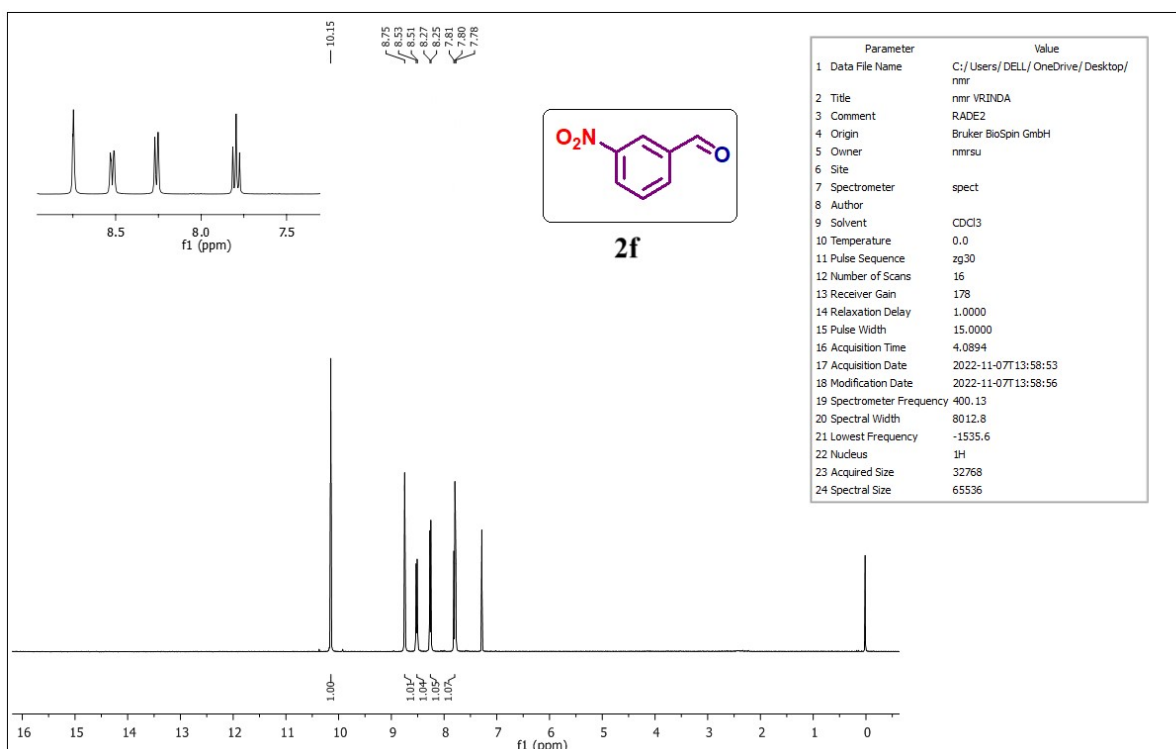

Figure 11.  $^1\text{H}$  NMR spectra of 3-Nitrobenzaldehyde.

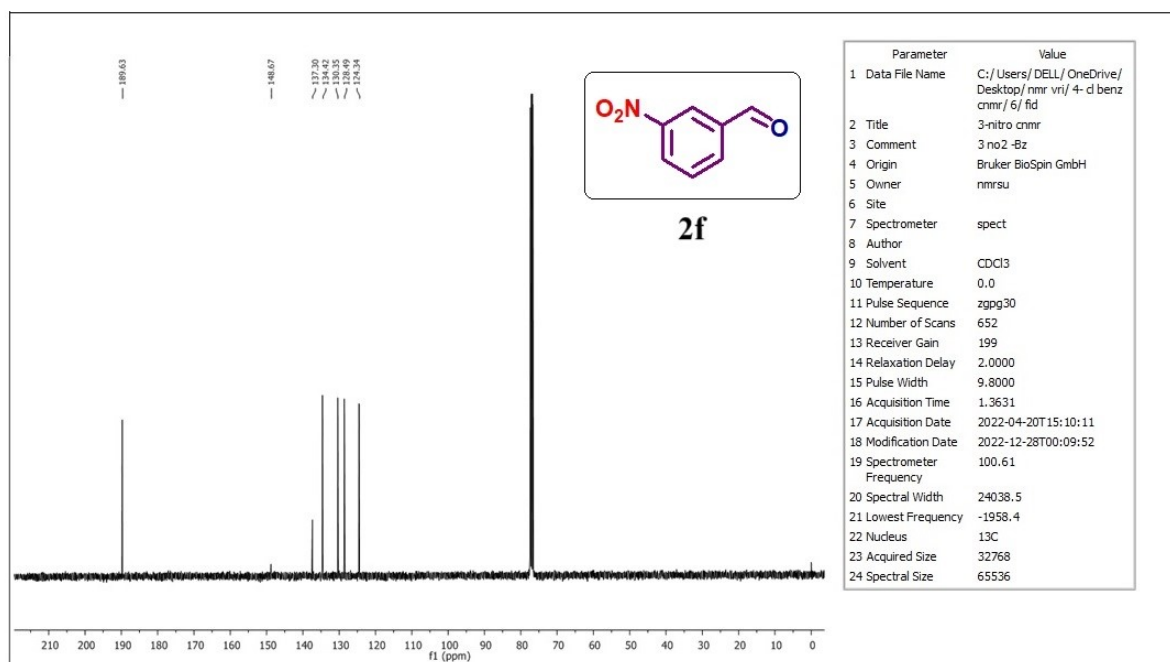

Figure 12.  $^{13}\text{C}$  NMR spectra of 3-Nitrobenzaldehyde.

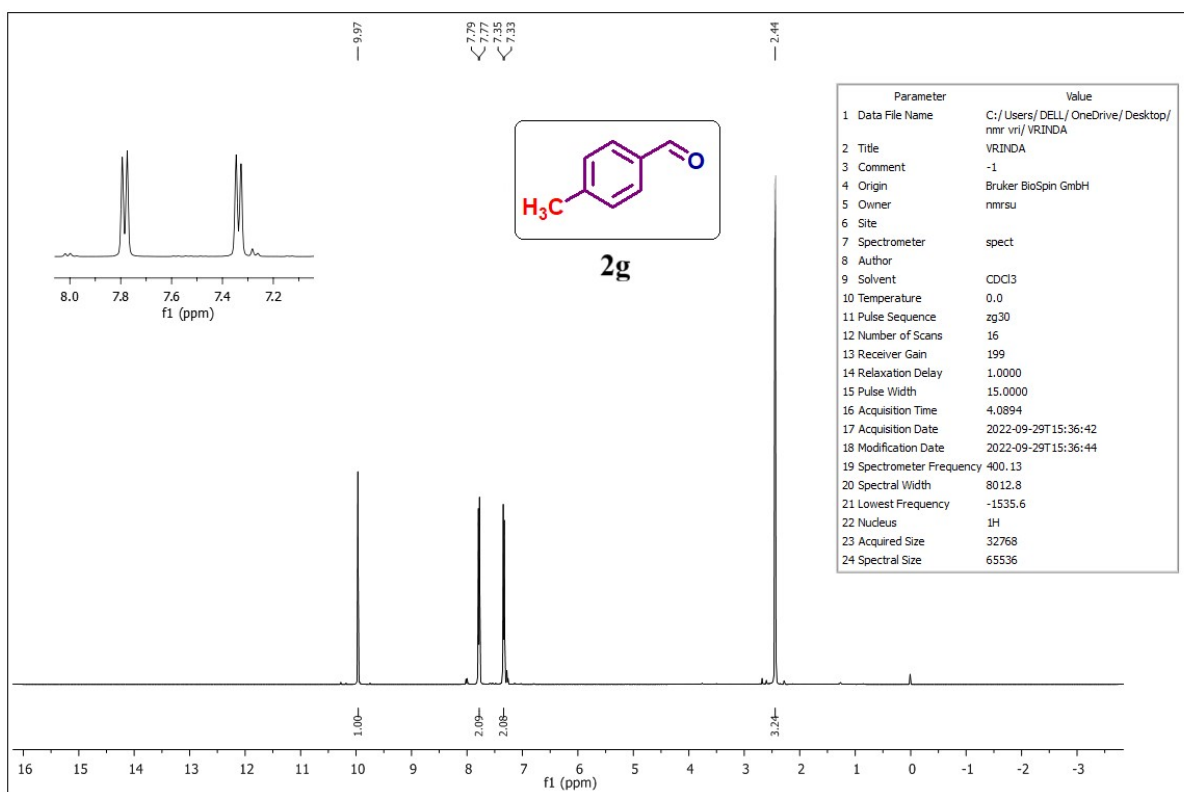

Figure 13. <sup>1</sup>H NMR spectra of 4-Methylbenzaldehyde.

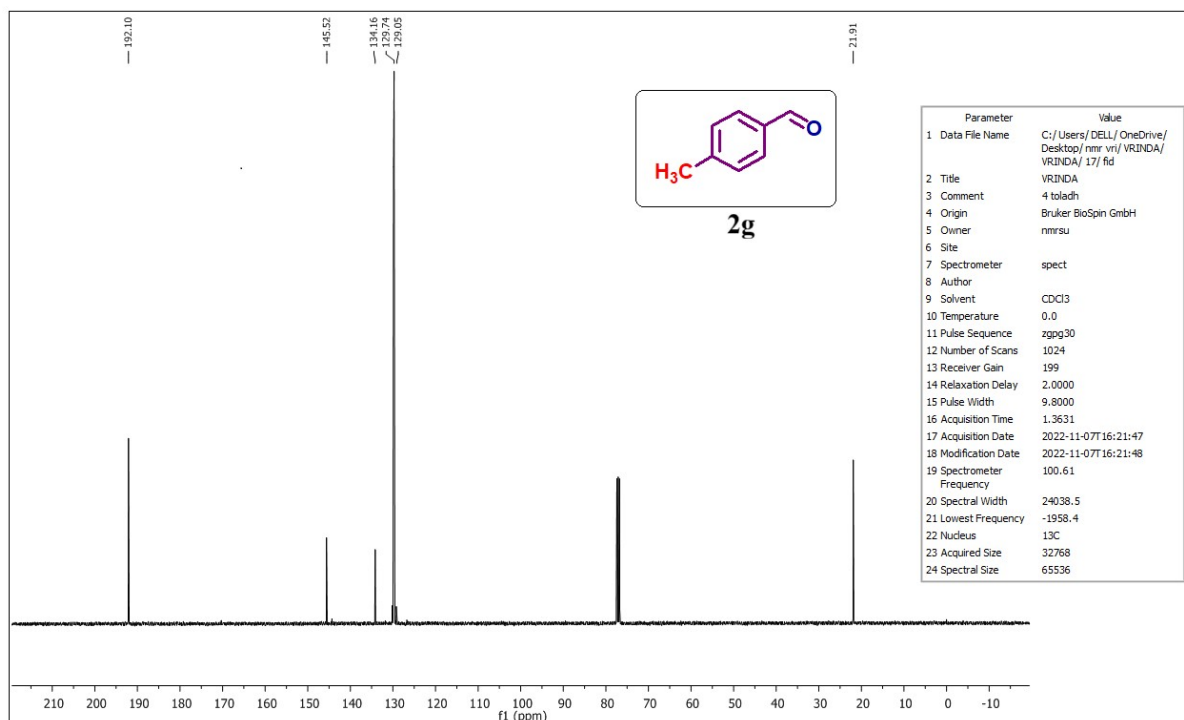

Figure 14. <sup>13</sup>C NMR spectra of 4-Methylbenzaldehyde.

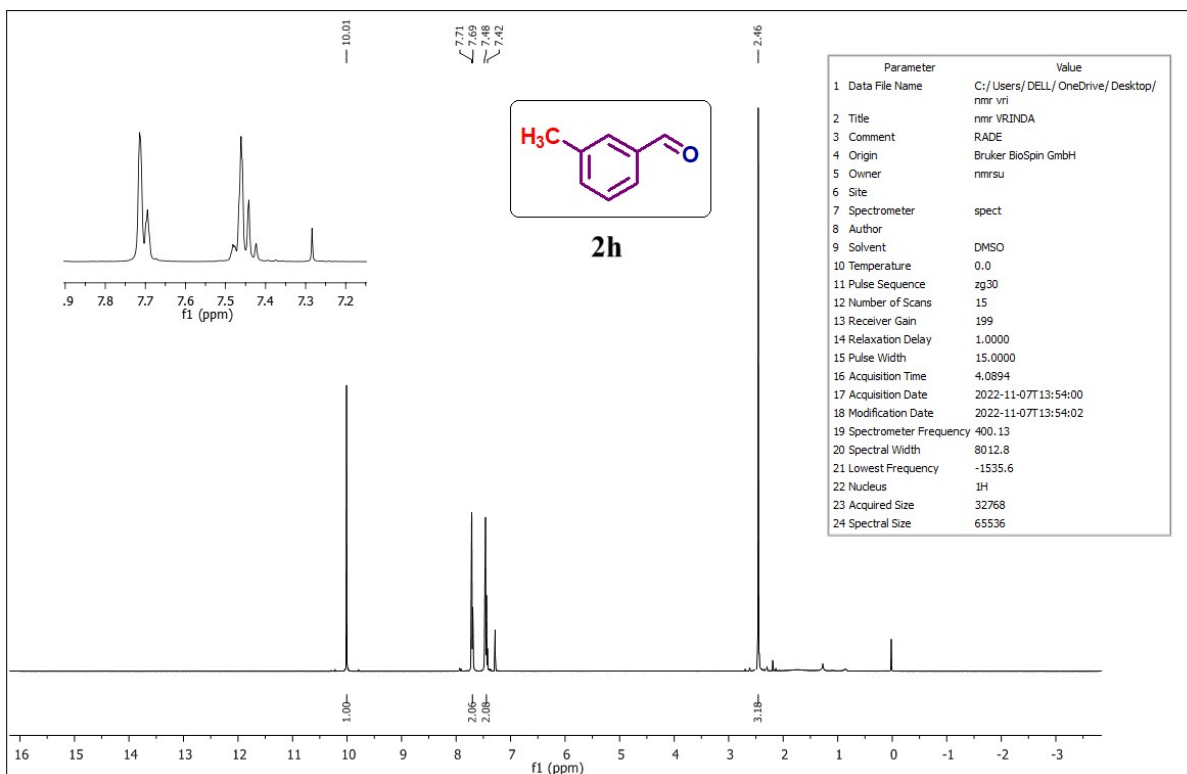

Figure 15. <sup>1</sup>H NMR spectra of 3-Methylbenzaldehyde.

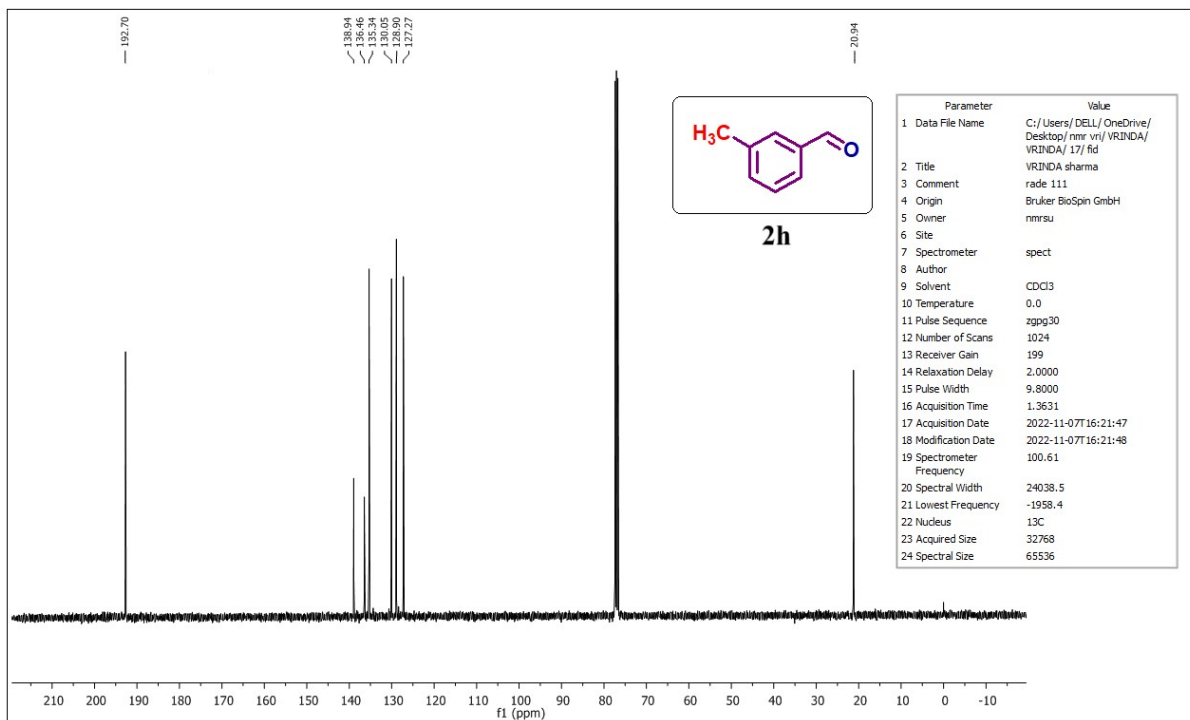

Figure 16. <sup>13</sup>C NMR spectra of 4-Methylbenzaldehyde.

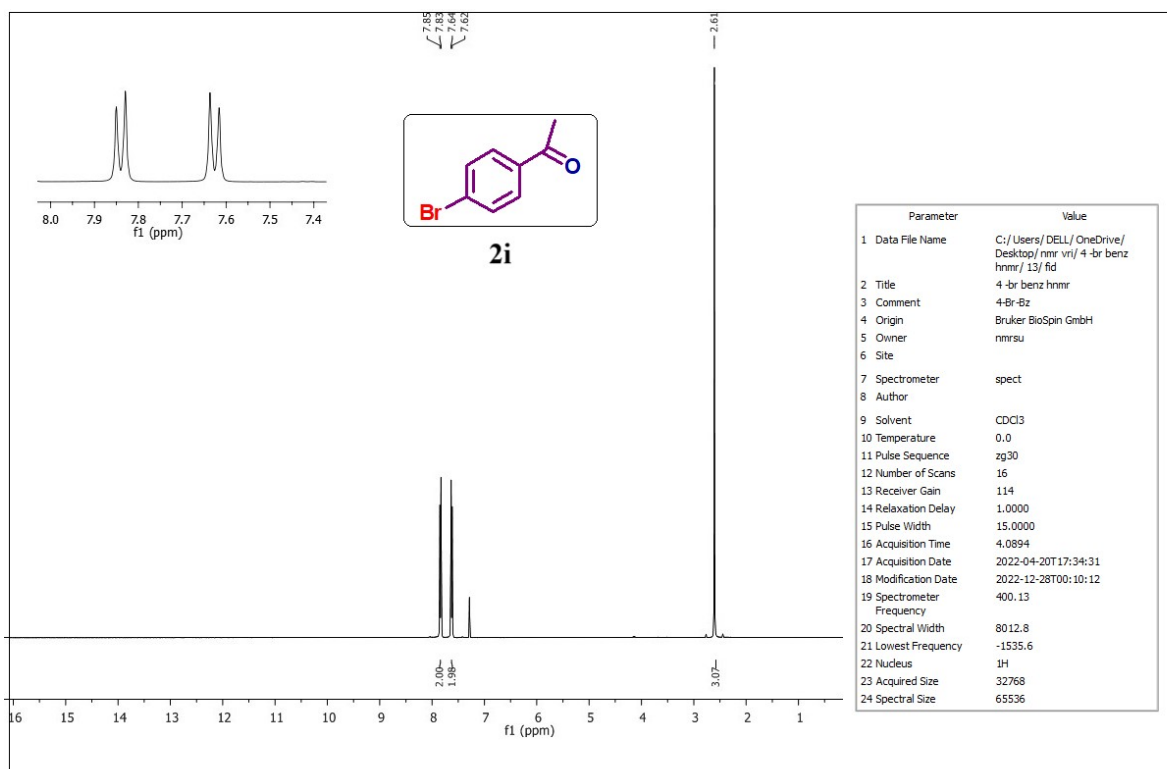

Figure 17. <sup>1</sup>H NMR spectra of 4-Bromoacetophenone.

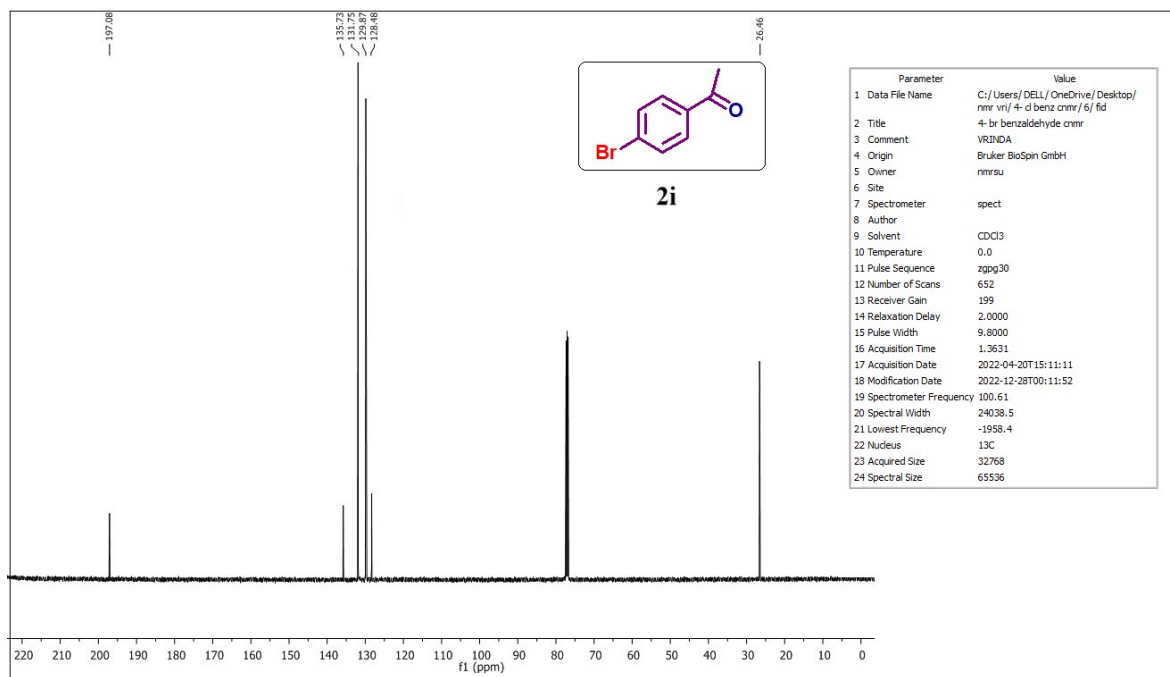

Figure 18. <sup>13</sup>C NMR spectra of 4-Bromoacetophenone.

## S5. <sup>1</sup>H NMR and <sup>13</sup>C NMR spectra of some compounds listed in Table 4

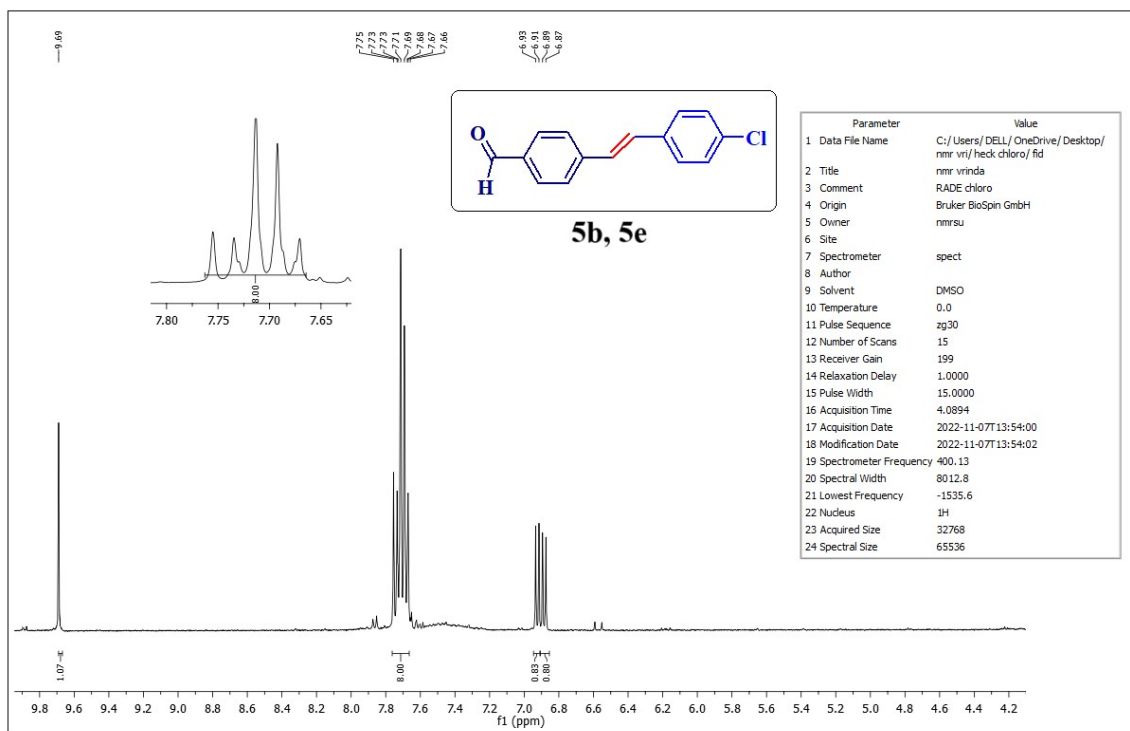

**Figure 19.** <sup>1</sup>H NMR spectra of 4-(4-chlorostyryl)benzaldehyde.

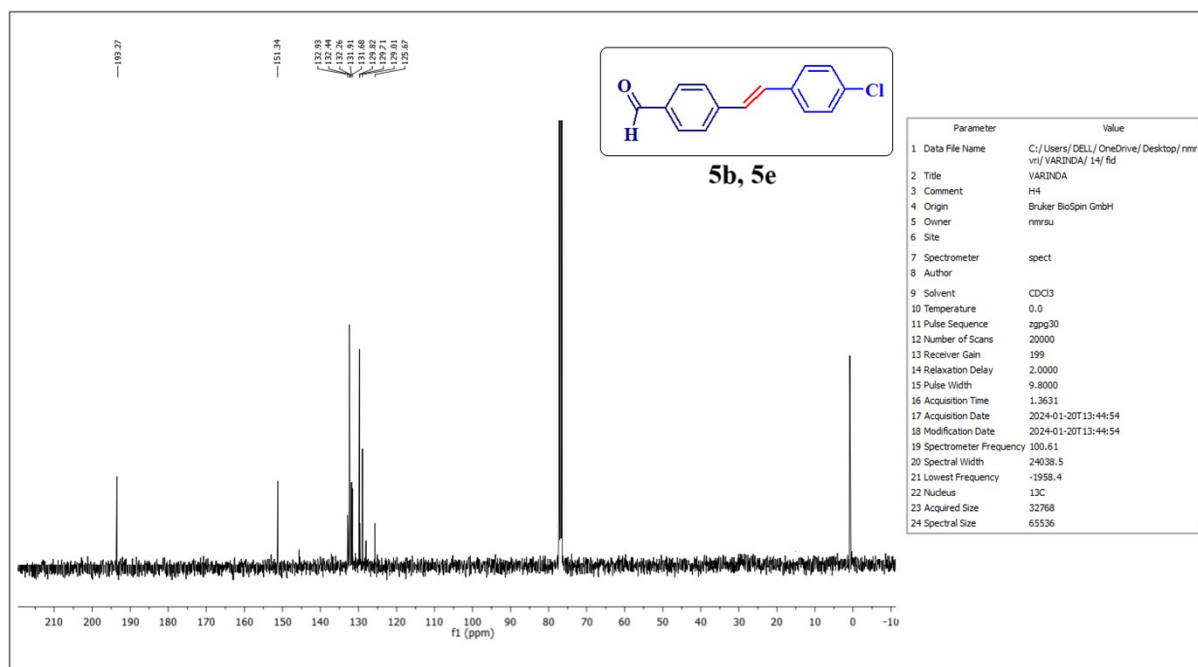

**Figure 20.** <sup>13</sup>C NMR spectra of 4-(4-chlorostyryl)benzaldehyde.

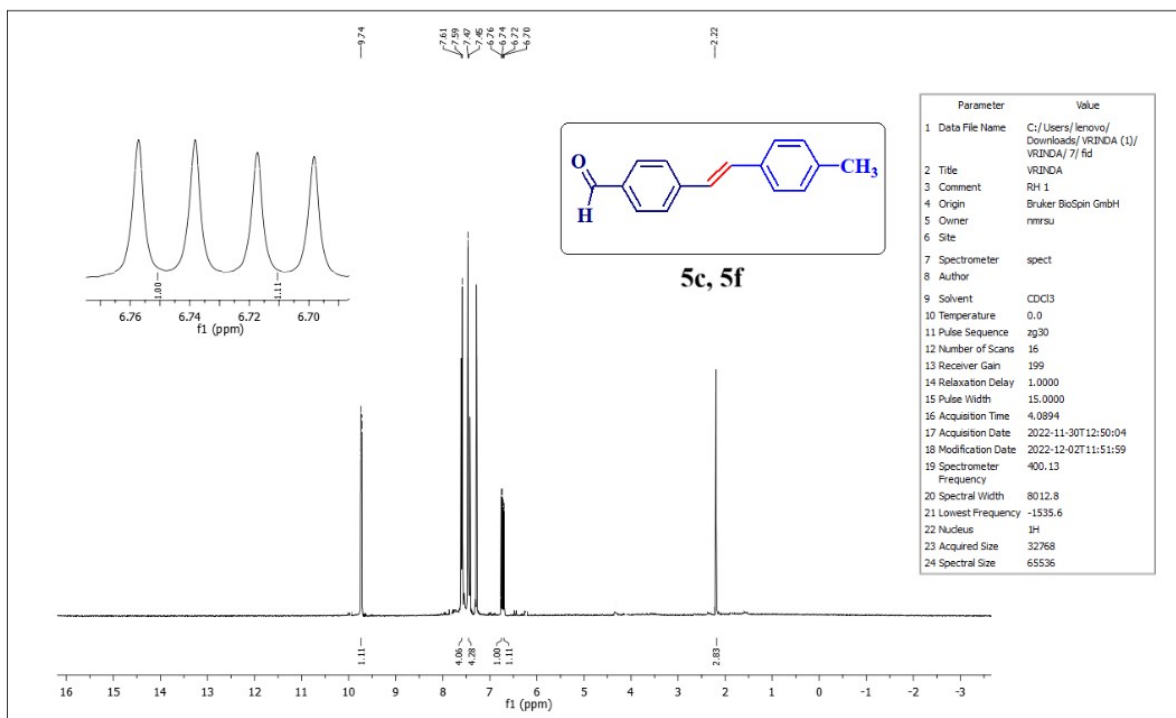

**Figure 22.** <sup>1</sup>H NMR spectra of 4-(4-methylstyryl)benzaldehyde.

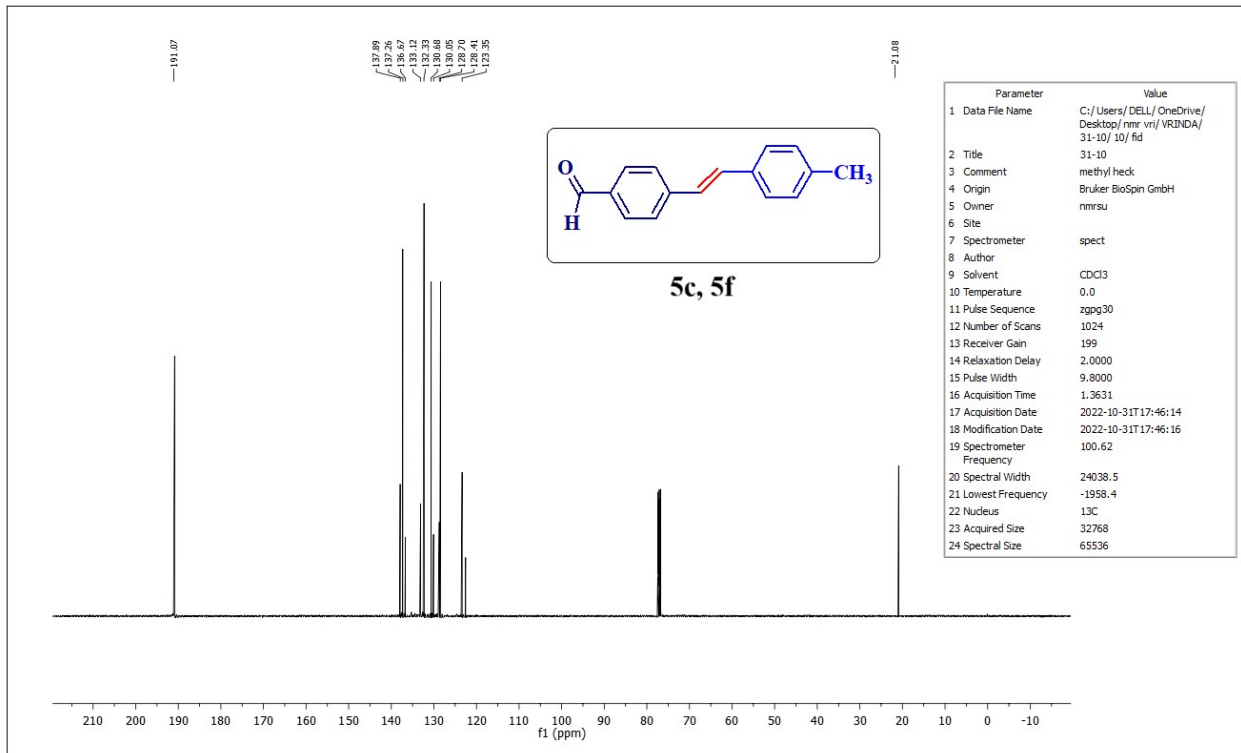

**Figure 22.** <sup>13</sup>C NMR spectra of 4-(4-methylstyryl)benzaldehyde.
